# Supplementary material
Source: PubMed Central journal article supplement (PMC9377739)
Supplement: ccr-21-1798_supplementary_tables_supp3.pdf [file ccr-21-1798_supplementary_tables_supp3.pdf]

## ***SUPPLEMENTARY TABLES***

### ImmunoPET of Ovarian and Pancreatic Cancer with AR9.6, a Novel MUC16-Targeted Therapeutic Antibody

*Sai Kiran Sharma*<sup>1</sup>, *Kyeera N. Mack*<sup>1,2,3</sup>, *Alessandra Piersigilli*<sup>4</sup>, *Jacob Pourat*<sup>1</sup>, *Kimberly J. Edwards*<sup>1</sup>, *Outi Keinänen*<sup>1,5</sup>, *Maria S. Jiao*<sup>4</sup>, *Huiyong Zhao*<sup>6</sup>, *Brandy White*<sup>7</sup>, *Cory L. Brooks*<sup>7</sup>,  
*Elisa de Stanchina*<sup>6</sup>, *Madi R. Madiyalakan*<sup>8</sup>, *Michael A. Hollingsworth*<sup>9</sup>, *Prakash Radhakrishnan*<sup>9</sup>, *Jason S. Lewis*<sup>1,3,10,11\*</sup> and *Brian M. Zeglis*<sup>1,5,10,12,13\*</sup>

<sup>1</sup> Department of Radiology, Memorial Sloan Kettering Cancer Center, New York, NY, USA

<sup>2</sup> Department of Pharmacology, Weill Cornell Medical College, New York, NY, USA

<sup>3</sup> Molecular Pharmacology Program, Memorial Sloan Kettering Cancer Center, New York, NY,  
USA

<sup>4</sup> Tri-Institutional Laboratory of Comparative Pathology, Memorial Sloan Kettering Cancer  
Center, Weill Cornell Medical College, and The Rockefeller University, NY, USA

<sup>5</sup> Department of Chemistry, Hunter College, City University of New York, New York, NY,  
10065

<sup>6</sup> Anti-Tumor Assessment Core, Memorial Sloan Kettering Cancer Center, NY, USA

<sup>7</sup> Department of Chemistry, California State University, Fresno, CA, USA

<sup>8</sup> Quest PharmaTech Inc., Edmonton, AB, Canada

<sup>9</sup> Eppley Institute for Research in Cancer and Allied Diseases, Fred and Pamela Buffett Cancer  
Center, University of Nebraska Medical Center, Omaha, NE, USA

<sup>10</sup> Department of Radiology, Weill Cornell Medical College, New York, NY, USA

<sup>11</sup> Radiochemistry and Molecular Imaging Probes Core, Memorial Sloan Kettering Cancer  
Center, New York, NY, USA

<sup>12</sup> Ph.D. Program in Chemistry, The Graduate Center of the City University of New York, New  
York, NY, 10016, United States

<sup>13</sup> Ph.D. Program in Biochemistry, The Graduate Center of the City University of New York,  
New York, NY, 10016, United States

## SUPPLEMENTARY TABLES

**Table S1.** Longitudinal *ex vivo* biodistribution data obtained from athymic nude mice bearing subcutaneous OVCAR3 xenografts that had been injected with  $0.11 \pm 0.02$  mg/kg [ $^{89}\text{Zr}$ ]Zr-DFO-muAR9.6 ( $24 \pm 1.4$   $\mu\text{Ci}$ ;  $0.88 \pm 0.05$  MBq;  $2.8 \pm 0.5$   $\mu\text{g}$ ). The radioactivity concentration values are represented as percentage injected dose per gram of tissue (%ID/g)  $\pm$  standard deviation (S.D.).

| Time (p.i.)<br>Tissues | Day 1          | Day 2          | Day 3          | Day 3-Blocked  | Day 4          | Day 5          |
|------------------------|----------------|----------------|----------------|----------------|----------------|----------------|
| Blood                  | 9.6 $\pm$ 4.1  | 7.0 $\pm$ 2.6  | 1.9 $\pm$ 1.7  | 9.5 $\pm$ 3.2  | 2.9 $\pm$ 1.7  | 2.9 $\pm$ 1.7  |
| Heart                  | 3.5 $\pm$ 1.6  | 2.3 $\pm$ 0.7  | 1.0 $\pm$ 0.8  | 3.1 $\pm$ 1.0  | 1.2 $\pm$ 0.6  | 1.2 $\pm$ 0.7  |
| Lungs                  | 4.3 $\pm$ 1.8  | 2.5 $\pm$ 0.9  | 0.9 $\pm$ 0.7  | 3.9 $\pm$ 1.7  | 1.9 $\pm$ 0.9  | 1.1 $\pm$ 0.2  |
| Liver                  | 8.8 $\pm$ 4.3  | 9.6 $\pm$ 4.2  | 15.5 $\pm$ 8.3 | 4.1 $\pm$ 0.6  | 9.4 $\pm$ 3.4  | 7.2 $\pm$ 3.3  |
| Spleen                 | 1.9 $\pm$ 0.5  | 1.9 $\pm$ 0.8  | 1.8 $\pm$ 0.4  | 2.5 $\pm$ 1.4  | 1.9 $\pm$ 0.4  | 2.1 $\pm$ 0.7  |
| Stomach                | 0.3 $\pm$ 0.2  | 0.5 $\pm$ 0.2  | 0.4 $\pm$ 0.3  | 0.4 $\pm$ 0.2  | 0.3 $\pm$ 0.1  | 0.3 $\pm$ 0.1  |
| L. Intestine           | 0.6 $\pm$ 0.4  | 0.6 $\pm$ 0.3  | 0.3 $\pm$ 0.1  | 0.3 $\pm$ 0.1  | 0.3 $\pm$ 0.1  | 0.3 $\pm$ 0.1  |
| S. Intestine           | 0.6 $\pm$ 0.2  | 0.7 $\pm$ 0.2  | 0.3 $\pm$ 0.1  | 0.7 $\pm$ 0.2  | 0.3 $\pm$ 0.1  | 0.3 $\pm$ 0.1  |
| Kidneys                | 3.1 $\pm$ 1.1  | 1.9 $\pm$ 0.6  | 1.2 $\pm$ 0.5  | 3.0 $\pm$ 0.9  | 1.5 $\pm$ 0.3  | 1.6 $\pm$ 0.5  |
| Muscle                 | 0.6 $\pm$ 0.1  | 0.8 $\pm$ 0.6  | 0.3 $\pm$ 0.1  | 0.6 $\pm$ 0.2  | 0.3 $\pm$ 0.1  | 0.2 $\pm$ 0.1  |
| Bone                   | 2.0 $\pm$ 0.6  | 1.4 $\pm$ 0.8  | 1.3 $\pm$ 0.3  | 2.4 $\pm$ 0.8  | 1.9 $\pm$ 0.6  | 2.8 $\pm$ 0.8  |
| Tail                   | 1.3 $\pm$ 0.3  | 1.2 $\pm$ 0.3  | 0.5 $\pm$ 0.2  | 1.2 $\pm$ 0.3  | 1.0 $\pm$ 0.7  | 0.7 $\pm$ 0.3  |
| Tumor                  | 12.0 $\pm$ 2.6 | 19.4 $\pm$ 2.7 | 17.9 $\pm$ 6.6 | 13.7 $\pm$ 5.8 | 35.4 $\pm$ 8.1 | 33.4 $\pm$ 3.5 |

**Table S2.** Two timepoint *ex vivo* biodistribution data obtained from athymic nude mice bearing subcutaneous SKOV3 xenografts that had been injected with  $0.11 \pm 0.02$  mg/kg [ $^{89}\text{Zr}$ ]Zr-DFO-muAR9.6 ( $24 \pm 1.4$   $\mu\text{Ci}$ ;  $0.88 \pm 0.05$  MBq;  $2.8 \pm 0.5$   $\mu\text{g}$ ). The radioactivity concentration values are represented as percentage injected dose per gram of tissue (%ID/g)  $\pm$  standard deviation (S.D.).

| Time (p.i.)<br>Tissues | Day 3          | Day 3-Blocked  | Day 5          |
|------------------------|----------------|----------------|----------------|
| Blood                  | $8.5 \pm 1.7$  | $10.8 \pm 2.5$ | $8.2 \pm 2.8$  |
| Heart                  | $3.1 \pm 0.7$  | $3.4 \pm 0.7$  | $2.5 \pm 0.6$  |
| Lungs                  | $2.8 \pm 0.6$  | $4.2 \pm 0.4$  | $3.4 \pm 1.2$  |
| Liver                  | $9.7 \pm 3.9$  | $11.3 \pm 5.8$ | $10.5 \pm 4.6$ |
| Spleen                 | $2.9 \pm 0.3$  | $3.5 \pm 0.4$  | $3.5 \pm 0.8$  |
| Stomach                | $0.5 \pm 0.2$  | $0.5 \pm 0.1$  | $1.0 \pm 0.4$  |
| L. Intestine           | $0.5 \pm 0.1$  | $0.4 \pm 0.1$  | $0.7 \pm 0.1$  |
| S. Intestine           | $0.7 \pm 0.03$ | $0.7 \pm 0.1$  | $0.8 \pm 0.2$  |
| Kidneys                | $3.0 \pm 0.4$  | $3.6 \pm 0.9$  | $3.2 \pm 0.6$  |
| Muscle                 | $0.8 \pm 0.1$  | $0.9 \pm 0.3$  | $0.7 \pm 0.2$  |
| Bone                   | $3.1 \pm 1.0$  | $3.2 \pm 0.5$  | $3.5 \pm 1.4$  |
| Tail                   | $1.3 \pm 0.2$  | $1.6 \pm 0.2$  | $1.3 \pm 0.3$  |
| Tumor                  | $12.3 \pm 1.1$ | $5.8 \pm 1.2$  | $14.8 \pm 3.4$ |

**Table S3.** Longitudinal *ex vivo* biodistribution data from the tumor, ipsilateral axillary lymph nodes (IALN), and contralateral axillary lymph nodes (CALN) of athymic nude mice bearing subcutaneous OVCAR3 xenografts that had been injected with  $0.11 \pm 0.02$  mg/kg [ $^{89}\text{Zr}$ ]Zr-DFO-muAR9.6 ( $24 \pm 1.4$   $\mu\text{Ci}$ ;  $0.88 \pm 0.05$  MBq;  $2.8 \pm 0.5$   $\mu\text{g}$ ). The radioactivity concentration values are represented as percentage injected dose per gram of tissue (%ID/g)  $\pm$  standard deviation (S.D.).

| Time (p.i.)<br>Tissues | Day 1             | Day 2            | Day 3             | Day 3-Blocked   | Day 4             | Day 5            |
|------------------------|-------------------|------------------|-------------------|-----------------|-------------------|------------------|
| Tumor                  | $12.0 \pm 2.6$    | $19.4 \pm 2.7$   | $17.9 \pm 6.6$    | $13.7 \pm 5.8$  | $35.4 \pm 8.1$    | $33.4 \pm 3.5$   |
| IALN                   | $414.6 \pm 146.8$ | $310.0 \pm 62.0$ | $367.4 \pm 232.3$ | $17.5 \pm 11.2$ | $704.3 \pm 286.1$ | $380.5 \pm 69.0$ |
| CALN                   | $9.7 \pm 1.0$     | $7.4 \pm 3.6$    | $5.6 \pm 2.6$     | $12.6 \pm 5.9$  | $9.2 \pm 2.3$     | $12.1 \pm 3.1$   |

**Table S4.** Longitudinal *ex vivo* biodistribution data from the ipsilateral axillary lymph nodes (IALN) and contralateral axillary lymph nodes (CALN) of athymic nude mice bearing subcutaneous OVCAR3 xenografts that had been injected with  $0.11 \pm 0.02$  mg/kg [ $^{89}\text{Zr}$ ]Zr-DFO-muAR9.6 ( $24 \pm 1.4$   $\mu\text{Ci}$ ;  $0.88 \pm 0.05$  MBq;  $2.8 \pm 0.5$   $\mu\text{g}$ ). The radioactivity concentration values are represented as percentage injected dose of tissue (%ID)  $\pm$  standard deviation (S.D.).

| Time (p.i.)<br>Tissues | Day 1          | Day 2           | Day 3           | Day 3-Blocked  | Day 4          | Day 5          |
|------------------------|----------------|-----------------|-----------------|----------------|----------------|----------------|
| IALN                   | $7.4 \pm 3.2$  | $10.5 \pm 2.8$  | $8.7 \pm 3.7$   | $0.3 \pm 0.13$ | $12.6 \pm 2.8$ | $7.7 \pm 1.1$  |
| CALN                   | $0.2 \pm 0.06$ | $0.15 \pm 0.06$ | $0.14 \pm 0.05$ | $0.3 \pm 0.18$ | $0.2 \pm 0.08$ | $0.2 \pm 0.09$ |

**Table S5.** Single timepoint biodistribution data collected 6 d p.i. from mice bearing three subcutaneous patient-derived ovarian cancer xenografts that had been injected with  $0.12 \pm 0.01$  mg/kg [ $^{89}\text{Zr}$ ]Zr-DFO-muAR9.6 ( $22.7 \pm 1.2$   $\mu\text{Ci}$ ;  $0.84 \pm 0.04$  MBq;  $3.0 \pm 0.3$   $\mu\text{g}$ ). The radioactivity concentration values are represented as percentage injected dose per gram of tissue (%ID/g)  $\pm$  standard deviation (S.D.).

| Tissues          | PDXs            |                |                 |
|------------------|-----------------|----------------|-----------------|
|                  | PDX0012         | PDX0004        | PDX0003         |
| Blood            | $0.2 \pm 0.0$   | $0.1 \pm 0.0$  | $4.6 \pm 4.1$   |
| Heart            | $0.2 \pm 0.0$   | $0.5 \pm 0.2$  | $1.9 \pm 1.6$   |
| Lungs            | $0.5 \pm 0.1$   | $0.7 \pm 0.5$  | $2.4 \pm 1.0$   |
| Liver            | $23.8 \pm 10.0$ | $13.3 \pm 6.1$ | $8.2 \pm 5.1$   |
| Spleen           | $13.2 \pm 8.1$  | $5.1 \pm 3.3$  | $2.7 \pm 0.5$   |
| Stomach          | $0.1 \pm 0.0$   | $0.2 \pm 0.1$  | $0.3 \pm 0.1$   |
| L. Intestine     | $0.1 \pm 0.0$   | $0.1 \pm 0.1$  | $0.3 \pm 0.1$   |
| S. Intestine     | $0.1 \pm 0.0$   | $0.1 \pm 0.1$  | $0.4 \pm 0.2$   |
| Uterus + Ovaries | $0.6 \pm 0.1$   | $1.3 \pm 0.2$  | $1.8 \pm 1.2$   |
| Kidneys          | $1.1 \pm 0.1$   | $1.1 \pm 0.2$  | $1.9 \pm 0.9$   |
| Muscle           | $0.1 \pm 0.1$   | $0.2 \pm 0.1$  | $0.4 \pm 0.2$   |
| Bone             | $3.5 \pm 0.8$   | $2.6 \pm 0.9$  | $2.8 \pm 0.4$   |
| Tail             | $0.3 \pm 0.0$   | $0.6 \pm 0.2$  | $1.0 \pm 0.7$   |
| Tumor            | $25.1 \pm 7.2$  | $28.1 \pm 5.2$ | $56.6 \pm 13.7$ |

**Table S6.** Single timepoint biodistribution data collected 6 d p.i. from mice bearing five subcutaneous PDAC xenografts that had been injected with  $0.30 \pm 0.03$  mg/kg [ $^{89}\text{Zr}$ ]Zr-DFO-muAR9.6 ( $27.7 \pm 0.9$   $\mu\text{Ci}$ ;  $1.02 \pm 0.03$  MBq;  $6.3 \pm 0.8$   $\mu\text{g}$ ). The radioactivity concentration values are represented as percentage injected dose per gram of tissue (%ID/g)  $\pm$  standard deviation (S.D.).

| Tissues  | Xenografts      |                 |                |                |               |
|----------|-----------------|-----------------|----------------|----------------|---------------|
|          | S2-028          | Capan-2         | T3M-4          | BxPC-3         | MIAPaCa-2     |
| Blood    | $8.8 \pm 2.9$   | $9.1 \pm 2.0$   | $7.0 \pm 2.9$  | $7.5 \pm 2.9$  | $8.4 \pm 2.6$ |
| Liver    | $7.2 \pm 2.0$   | $7.3 \pm 0.9$   | $4.4 \pm 1.1$  | $7.7 \pm 4.8$  | $4.8 \pm 0.6$ |
| Spleen   | $5.4 \pm 1.4$   | $6.1 \pm 1.2$   | $4.0 \pm 1.3$  | $4.2 \pm 0.6$  | $4.4 \pm 1.2$ |
| Pancreas | $1.0 \pm 0.2$   | $1.2 \pm 0.3$   | $0.9 \pm 0.4$  | $1.0 \pm 0.2$  | $1.0 \pm 0.3$ |
| Kidneys  | $3.4 \pm 0.8$   | $3.7 \pm 0.4$   | $3.1 \pm 0.7$  | $2.8 \pm 0.7$  | $3.1 \pm 0.7$ |
| Muscle   | $0.8 \pm 0.1$   | $0.8 \pm 0.1$   | $0.7 \pm 0.2$  | $0.6 \pm 0.2$  | $0.7 \pm 0.2$ |
| Bone     | $5.6 \pm 1.6$   | $5.7 \pm 1.6$   | $4.4 \pm 0.5$  | $3.5 \pm 0.7$  | $4.4 \pm 0.4$ |
| Tumor    | $69.5 \pm 12.3$ | $53.7 \pm 14.1$ | $39.2 \pm 9.8$ | $32.9 \pm 4.1$ | $6.9 \pm 0.6$ |

**Table S7.** Ex vivo biodistribution data collected from athymic nude mice bearing subcutaneous S2-028 xenografts that had been injected with 0.25 mg/kg [<sup>89</sup>Zr]Zr-DFO-huAR9.6 (29 μCi; 1.07 MBq; 6.2 μg). The radioactivity concentration values are represented as percentage injected dose per gram of tissue (%ID/g) ± standard deviation (S.D.).

| Tissues \ Time (p.i.) | Day 1      | Day 3      | Day 3-Blocked | Day 6       |
|-----------------------|------------|------------|---------------|-------------|
| Blood                 | 14.2 ± 1.0 | 10.9 ± 1.8 | 14.2 ± 1.6    | 5.8 ± 3.9   |
| Heart                 | 5.5 ± 0.8  | 3.7 ± 1.0  | 4.9 ± 0.7     | 2.4 ± 1.1   |
| Lungs                 | 3.9 ± 0.2  | 3.3 ± 0.4  | 5.0 ± 1.3     | 2.2 ± 0.9   |
| Liver                 | 3.6 ± 0.4  | 5.3 ± 0.8  | 5.7 ± 2.4     | 5.2 ± 2.1   |
| Spleen                | 5.0 ± 0.2  | 7.9 ± 2.8  | 4.1 ± 0.9     | 7.0 ± 2.6   |
| Pancreas              | 1.2 ± 0.1  | 0.9 ± 0.1  | 1.1 ± 0.1     | 0.7 ± 0.2   |
| Kidneys               | 4.7 ± 0.3  | 4.2 ± 0.7  | 5.0 ± 0.5     | 3.4 ± 0.8   |
| Muscle                | 0.9 ± 0.1  | 0.7 ± 0.1  | 0.9 ± 0.1     | 0.5 ± 0.2   |
| Bone                  | 1.6 ± 0.1  | 2.5 ± 0.7  | 2.6 ± 0.3     | 2.9 ± 1.2   |
| Tumor                 | 20.4 ± 5.2 | 39.4 ± 2.3 | 9.3 ± 2.3     | 56.1 ± 21.8 |



**Table S8.** *Ex vivo* biodistribution data collected from mice bearing subcutaneous OVCAR3 xenografts that had been injected with 0.25 mg/kg [<sup>89</sup>Zr]Zr-DFO-huAR9.6 (29 μCi; 1.07 MBq; 6.2 μg). The radioactivity concentration values are represented as percentage injected dose per gram of tissue (%ID/g) ± standard deviation (S.D.).

| Tissues          | Time (p.i.) |             |
|------------------|-------------|-------------|
|                  | D1          | D6          |
| Blood            | 14.4 ± 1.2  | 3.5 ± 2.6   |
| Heart            | 5.0 ± 1.4   | 1.4 ± 0.8   |
| Lungs            | 3.5 ± 0.3   | 1.7 ± 1.1   |
| Liver            | 5.5 ± 2.1   | 5.8 ± 2.2   |
| Spleen           | 3.3 ± 0.3   | 5.1 ± 1.5   |
| Uterus + Ovaries | 3.3 ± 0.6   | 1.6 ± 0.6   |
| Kidneys          | 4.6 ± 0.8   | 3.5 ± 1.1   |
| Muscle           | 0.8 ± 0.2   | 0.3 ± 0.1   |
| Bone             | 1.6 ± 0.1   | 2.5 ± 0.3   |
| Tumor            | 30.1 ± 3.5  | 71.0 ± 24.1 |
